## Impact of gender on long-term prognosis after transcatheter edge-to-edge repair for mitral regurgitation

M. Geyer<sup>1</sup>, K. Keller<sup>1</sup>, S. Born<sup>1</sup>, K. Bachmann<sup>1</sup>, M.M. Hell<sup>1</sup>, A.R. Tamm<sup>1</sup>, T.F. Ruf<sup>1</sup>, F. Kreidel<sup>1</sup>, A. Petrescu<sup>1</sup>, K. Schnitzler<sup>1</sup>, V.H. Schmitt<sup>1</sup>, J.G. Da Rocha E Silva<sup>1</sup>, E. Schulz<sup>2</sup>, T. Munzel<sup>1</sup>, R.S. Von Bardeleben<sup>1</sup>

<sup>1</sup>University Medical Center Mainz, Mainz, Germany; <sup>2</sup>General Hospital of Celle, Celle, Germany

**Funding Acknowledgement:** Type of funding sources: None.

**Background:** A symptomatic and prognostic benefit by transcatheter edge-to-edge repair (TEER) for mitral regurgitation (MR) has been proven. A variety of individual factors including female sex has been suggested to be associated with adverse outcome in cardio-surgical procedures.

**Purpose:** While gender is factored in common risk factor models for adverse outcome, evidence on sex-specific differences in long-term outcome after TEER for MR is limited. We aimed to investigate the impact of gender on prognosis in a large monocentric cohort with long-term follow-up.

**Methods:** We analyzed survival stratified for gender after successful isolated edge-to-edge repair of MR in the period between 06/2010 and 03/2018 (exclusion of combined forms of TMVR) in a monocentric retrospective cohort by performing survival analyses and cox regression analyses.

**Results:** Consecutively, 627 patients (47.0% females, 57.4% functional MR; survival status was available in 96.7%) entered the study and were followed for a median follow-up period of 462 days [IQR 142–945 days]. Survival rates were 97.6% at discharge, 75.7% after 1, 54.5% after 3, 37.6% after 5 and 21.7% after 7 years. Risk score as calculated by the Logistic Euroscore I did not differ significantly between females and males (at baseline: 25.0 [IQR 18.0/34.8] vs. 27.0 [18.4/40.1],  $p=0.093$ ) and no rele-

vant differences were found for in-hospital (2.0 vs. 2.7%,  $p=0.613$ ), 30 days (4.8 vs. 6.5%,  $p=0.473$ ) and 1-year mortality (27.0 vs. 25.3%,  $p=0.675$ ). At the time of procedure, women were older (79.9 [IQR 75.6/84.4] vs. 78.3 [72.9/83.4] years,  $p<0.001$ ), were less often affected by coronary artery disease (53.1% vs. 75.0%  $p<0.001$ ), diabetes mellitus (23.7% vs. 31.3%,  $p=0.040$ ) and impaired left ventricular function ( $44.5\pm 12.9\%$  vs.  $38.9\pm 13.4\%$ ,  $p<0.001$ ). Regarding long-term survival, women had a better prognosis after MR-therapy, especially in functional etiology: e.g., 4-year survival in FMR 65.7 vs. 35.7%,  $p=0.006$  (Figure 1). Remarkably, female sex was associated with a lower risk for long-term mortality in the Cox-regression models, especially in the FMR subgroup (total cohort: univariate HR 0.81 [0.62–1.04],  $p=0.101$ ; FMR: univariate HR 0.68 [0.49–0.96],  $p=0.028$ ).

**Conclusion:** In our cohort of patients undergoing TEER for MR, we found no evidence for an impaired short- and mid-term prognosis for female patients. In contrary and not as indicated by Logistic Euroscore, female sex was associated with better long-term survival in comparison to men despite higher median age, which might be partly explained by a slightly more favorable cardiovascular risk profile.

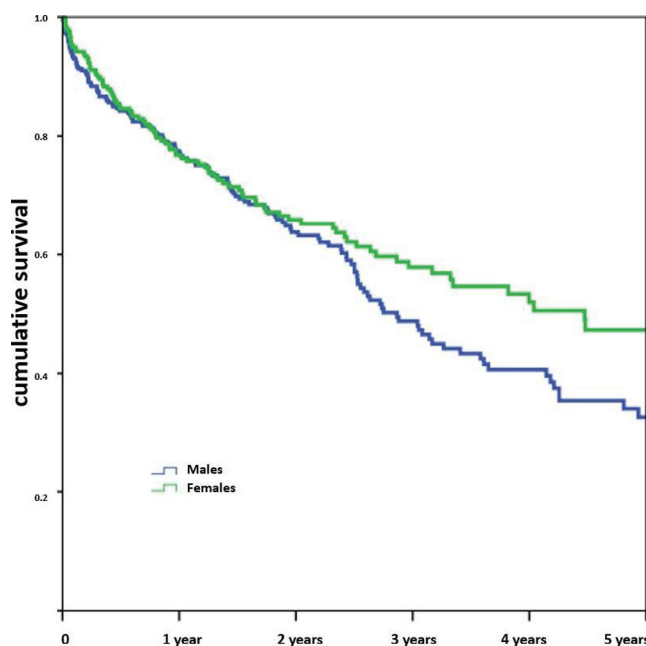

Figure 1
